# Supplementary material for: Amyloid Beta Oligomers Activate Death Receptors and Mitochondria-Mediated Apoptotic Pathways in Cerebral Vascular Smooth Muscle Cells; Protective Effects of Carbonic Anhydrase Inhibitors
Source: MDPI journal article supplement (doi:10.3390/cells12242840), 2023-12-14
Supplement: s1 [file s1]

**A**

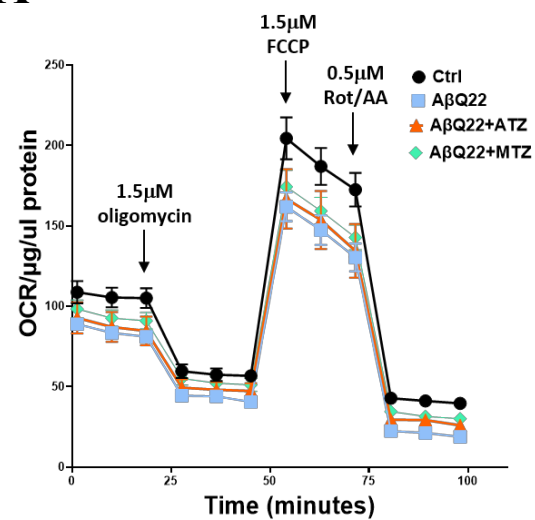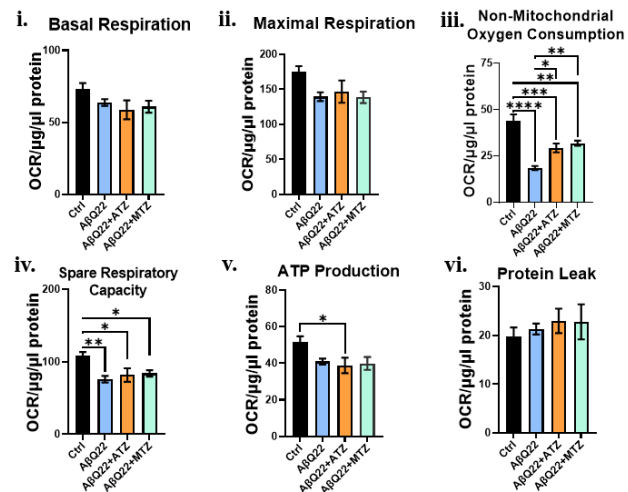

**B**

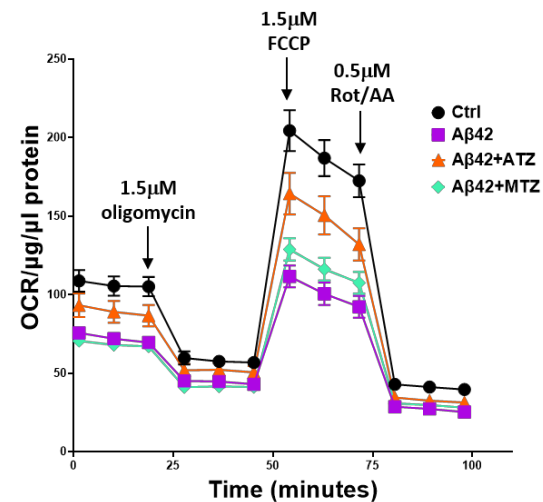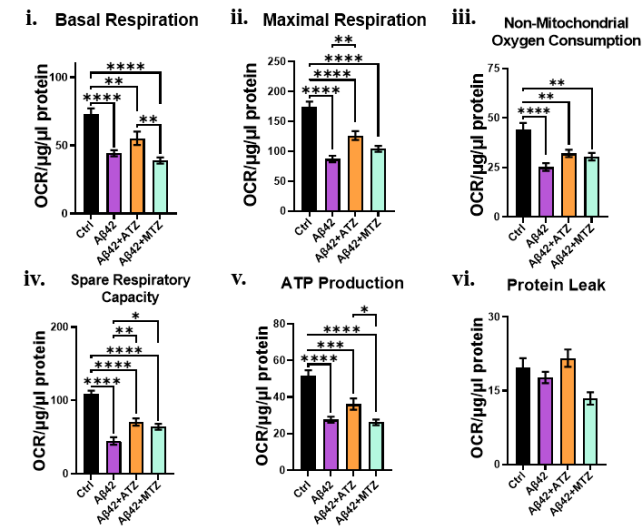

**Figure S1. Effects of CAIs on mitochondrial respiration in Aβ-treated BVSMCs.**

## Supplementary Figure Legends

### Figure S1.

#### Effects of CAIs on mitochondrial respiration in A $\beta$ -treated BVSMCs.

**A)** and **(B)** Measurement of mitochondrial respiration in BVSMCs, treated for 24hrs with 10 $\mu$ M A $\beta$ 40-Q22 (**A**) and A $\beta$ 42 (**B**), in presence or absence of CAIs. **A)** A $\beta$ 40-Q22 significantly impairs oxygen consumption rate (OCR) in non-mitochondrial oxygen consumption (**iii**) and spare respiratory capacity (**iv**) measurements, without affecting basal respiration (**i**), maximal respiration (**ii**), ATP production (**v**) and proton leak (**vi**). Both CAIs rescue non-mitochondrial oxygen consumption (**iii**). **B)** A $\beta$ 42 significantly impair basal respiration (**i**), maximal respiration (**ii**), non-mitochondrial oxygen consumption (**iii**), spare respiratory capacity (**iv**), and ATP production (**v**) in BVSMCs, with no effect on proton leak (**vi**). For **(A)** and **(B)**, data are plotted following normalization to protein concentration. Graphs represent 3 independent experiments, with 6 replicates per group. Data are plotted as mean + SEM, and statistical significance was evaluated by One-way ANOVA, followed by Tukey's multiple comparisons test. \* =  $p < 0.05$ , \*\* =  $p < 0.01$ , \*\*\* =  $p < 0.001$ , and \*\*\*\* =  $p < 0.0001$ , compared to untreated BVSMCs.
